# Supplementary figures and images for: Clinical emergency care quality indicators in Africa: a scoping review and data summary
Source: HighWire-hosted journal article supplement (doi:10.1136/bmjopen-2022-069494), 2023-05-01

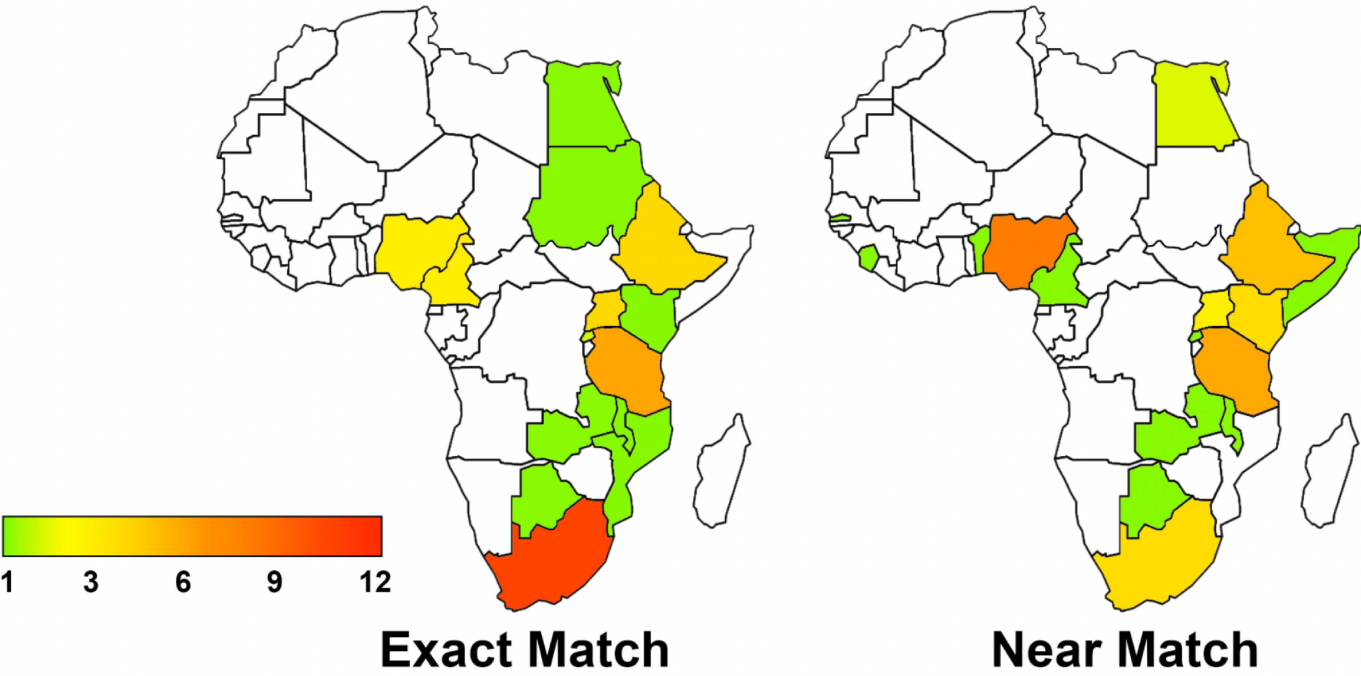

Supplement: bmjopen-2022-069494supp006_data_supplement.pdf [file bmjopen-2022-069494supp006_data_supplement.pdf]
